# A supervised fingerprint-based strategy to connect natural product mass spectrometry fragmentation data to their biosynthetic gene clusters

**Authors:** Tiago F. Leao<sup>1</sup>, Mingxun Wang<sup>1,2</sup>, Ricardo da Silva<sup>3</sup>, Justin J.J. van der Hooft<sup>4</sup>, Anelize Bauermeister<sup>1</sup>, Asker Brejnrod<sup>1</sup>, Evgenia Glukhov<sup>5</sup>, Lena Gerwick<sup>5</sup>, William H. Gerwick<sup>1,5</sup>, Nuno Bandeira<sup>1,2</sup>, Pieter C. Dorrestein<sup>1,6,7,\*</sup>.

## Author Affiliations:

1 – Collaborative Mass Spectrometry Innovation Center, Skaggs School of Pharmacy and Pharmaceutical Sciences, University of California San Diego, La Jolla, California, USA.

2 – Center for Computational Mass Spectrometry, University of California San Diego, La Jolla, California, USA.

3 – NPPNS, Physic and Chemistry Department, School of Pharmaceutical Sciences of Ribeirão Preto, University of São Paulo, Ribeirão Preto, Brazil.

4 – Bioinformatics Group, Wageningen University, Wageningen, the Netherlands.

5 – Center for Marine Biotechnology and Biomedicine, Scripps Institution of Oceanography, University of California San Diego, La Jolla, California, USA.

6 – Center for Microbiome Innovation, University of California San Diego, La Jolla, California, USA.

7 – Departments of Pharmacology and Pediatrics, University of California San Diego, La Jolla, California, USA.

\* Corresponding author

## Abstract

Microbial natural products, in particular secondary or specialized metabolites, are an important source and inspiration for many pharmaceutical and biotechnological products. However, bioactivity-guided methods widely employed in natural product discovery programs do not explore the full biosynthetic potential of microorganisms, and they usually miss metabolites that are produced at low titer. As a complementary method, the use of genome-based mining in natural products research has facilitated the charting of many novel natural products in the form of predicted biosynthetic gene clusters that encode for their production. Linking the biosynthetic potential inferred from genomics to the specialized metabolome measured by metabolomics would accelerate natural product discovery programs. Here, we applied a supervised machine learning approach, the *K*-Nearest Neighbor (KNN) classifier, for systematically connecting metabolite mass spectrometry data to their biosynthetic gene clusters. This pipeline offers a method for annotating the biosynthetic genes for known, analogous to known and cryptic metabolites that are detected via mass spectrometry. We demonstrate this approach by automated linking of six different natural product mass spectra, and their analogs, to their corresponding biosynthetic genes. Our approach can be applied to bacterial, fungal, algal and plant systems where genomes are paired with corresponding MS/MS spectra. Additionally, an approach that connects known metabolites to their biosynthetic genes

42 potentially allows for bulk production via heterologous expression and it is especially useful for  
43 cases where the metabolites are produced at low amounts in the original producer.

## 44 Significance

45  
46 The pace of natural products discovery has remained relatively constant over the last  
47 two decades. At the same time, there is an urgent need to find new therapeutics to fight  
48 antibiotic resistant bacteria, cancer, tropical parasites, pathogenic viruses, and other severe  
49 diseases. To spark the enhanced discovery of structurally novel and bioactive natural products,  
50 we here introduce a supervised learning algorithm (*K*-Nearest Neighbor) that can connect  
51 known and analogous to known, as well as MS/MS spectra of yet unknowns to their  
52 corresponding biosynthetic gene clusters. Our Natural Products Mixed Omics tool provides  
53 access to genomic information for bioactivity prediction, class prediction, substrate predictions,  
54 and stereochemistry predictions to prioritize relevant metabolite products and facilitate their  
55 structural elucidation.

## 56 Introduction

57  
58 Microbial natural products (NPs), also referred to as secondary or specialized  
59 metabolites, are often made by biosynthetic genes that are physically grouped into clusters  
60 (biosynthetic gene clusters or BGCs). It's been found that algae and plants can also contain  
61 BGCs, to some extent organized in a similar manner (1, 2). One of the challenges in the genome  
62 mining field is to connect microbial metabolites to their BGCs. Even the genome of  
63 *Streptomyces coelicolor* A3(2), one of the first sequenced microbial genomes, still contains a  
64 number of cryptic BGCs (BGCs without known metabolites)(3). In 2011, the bioinformatics tool  
65 antiSMASH (4) drastically improved the identification and annotation of BGCs based on  
66 automated genome mining. Similarly, since 2018, the program BiG-SCAPE (5) can reliably  
67 calculate the similarity between pairs of BGCs, grouping them into gene cluster families (GCFs).  
68 Recently, a number of approaches and tools have been created to connect NPs to their  
69 biosynthetic gene clusters, such as Pattern-based Genome Mining (6, 7), MetaMiner (8),  
70 CycloNovo (9), and NPLinker (10), recently reviewed by Van der Hooft *et al.*, 2020 (11).  
71 However, most of these tools are not high-throughput or can only be used for a particular class  
72 of BGC (e.g., peptides or BGCs homologous to known BGCs). It has been challenging to create a  
73 systematic tool that can work at a repository scale to connect NP genotypes (BGCs) with their  
74 phenotypes (for example MS/MS spectra from untargeted mass spectrometry fragmentation  
75 profiles, LC-MS/MS). As a result, a large disparity exists between the number of known NPs  
76 versus the number of known BGCs. For example, the recently designated cyanobacterial genus  
77 *Moorena* has already yielded over 200 new metabolites, yet only a dozen of validated BGCs are  
78 currently deposited for this genus in the expert-annotated Minimum Information about a  
79 Biosynthetic Gene cluster (MIBiG) database (12). Connecting the molecules to the genes would  
80 facilitate research into the ecological role and functions of the specialized metabolome by  
81 studying the regulation of the expression of their biosynthetic gene clusters.

82 To begin to address this gene cluster annotation gap, we deployed a *K*-Nearest Neighbor  
83 (KNN) algorithm that uses a similarity/absence BGC fingerprints and analogous

84 similarity/absence MS/MS fingerprints to classify gene cluster family (GCF, a group of similar  
85 BGCs) candidates for each MS/MS spectrum (Fig. 1). We recently sequenced draft  
86 metagenomic-assembled genomes (MAGs) for 60 cyanobacteria, mostly from tropical marine  
87 environments. The most complete drafts were reported in Leao *et al.*, 2021 (13), and for these  
88 we also obtained untargeted metabolomic data via LC-MS/MS (36 deposited in the PoDP  
89 platform and 24 not published due to the quality of their paired MAGs). Despite the bad quality  
90 of some of these MAGs, we could still annotated BGCs. As a first test for our NPOMix workflow,  
91 using this cyanobacterial dataset, we connected curacin A's MS/MS spectrum with its correct  
92 GCF/BGC. The performance of our KNN approach was superior to using a Mantel correlation  
93 method (the Jupyter notebook for this correlation is available at the GitHub repository:  
94 <https://github.com/tiagolbiotech/NPOMix>). The major limitation for evaluation of our method  
95 was the lack of available test data for structures that are linked to their MS/MS spectra and  
96 biosynthetic gene clusters.

97 However, the training and testing set was expanded by the paired omics dataset from  
98 the recently built Paired Omics Data Platform (PoDP) (14), and enabled a further evaluation of  
99 our KNN tool (named NPOMix). The PoDP is the first community effort to make available  
100 validated links between BGCs, structures, and MS/MS spectra. In the present work, we used 36  
101 out of the 71 paired metadatasets (listed in Dataset S1, sheet one). We selected genomic  
102 samples that contained a valid Genome ID or BioSample ID to aid in downloading them from  
103 the National Center for Biotechnology Information (NCBI) database, resulting in 732  
104 genomes/MAGs obtained from these 36 PoDP metadatasets. Following the same procedure of  
105 the genomes, we also selected and assembled 1,034 metagenomes from part of these PoDP  
106 datasets. Additionally, using already linked MS/MS-BGC information from the PoDP and from a  
107 NPLinker dataset (10), we obtained validated data for eight metabolite families (major  
108 compounds and analogs). These compound families were orfamides, albicidins, bafilomycin,  
109 nevaltophin D, jamaicamide, hectochlorin, palmyramide and cryptomaldamide (totaling 15  
110 reference MS/MS spectra due to the presence of analogs and sometimes more than one  
111 spectrum per metabolite). By training with the BGC fingerprints and testing these 15 validated  
112 links, we were able to correctly predict GCFs for 66.66% of the tested MS/MS fingerprints  
113 (10/15 reference MS/MS spectra were correctly classified using  $k = 3$ ). Well-annotated links can  
114 be quickly prioritized by comparing substructures to mass differences in the fragmentation  
115 spectrum and/or predicted structures. A two-dimensional comparison of both types of  
116 fingerprints (BGC and MS/MS) can be a proxy for distinguishing some true positives from false  
117 positives. Critically, we filtered for BGC-MS/MS links wherein the query MS/MS spectra were  
118 mainly present in the same strains that the query BGCs were found (cutoff of 90% concordance  
119 between both BGC and MS/MS fingerprints). Once the PoDP data was filtered, our approach  
120 could connect BGCs with three types of mass spectra: known molecules (e.g., links that are  
121 validated experimentally), analogs of known molecules (e.g., links not validated but similar to  
122 validated reference spectra from the MS/MS database) or cryptic molecules (e.g., links without  
123 any library match, absent from the MS/MS database). We exemplify how it is possible to  
124 connect known BGCs to cryptic MS/MS spectra, new spectra that can be added to the current  
125 MS/MS databases. The same approach can be used for connecting new BGCs to cryptic MS/MS  
126 spectra that can be validated experimentally. While our approach uses unique fingerprints and  
127 a machine learning approach for connecting metabolites to BGCs, it can be considered a type of

128 Pattern-based Genome Mining (PBGGM) which was previously reported by Doroghazi *et al.* in  
129 2014 and Duncan *et al.* in 2015 (6, 7). PBGM is based on the idea that the distribution of a given  
130 secondary metabolite should be comparable to the distribution of the BGCs responsible for  
131 their production.

132 Generally, finding novel metabolites for cryptic BGCs or even known BGCs (e.g., novel  
133 analogs) is very useful to accelerate natural products discovery, however, connection of known  
134 metabolites to their biosynthetic gene clusters is also important. Newly linked BGCs for known  
135 metabolites can lead to the discovery of new enzymatic processes. For example, in the strain  
136 *Anabaena variabilis* ATCC 29413, a NRPS gene is responsible for the attachment of a serine  
137 residue to generate the final mycosporine-like amino acids (MAA) product. However, in the  
138 strain *Nostoc punctiforme* ATCC 29133, this same step is performed by an ATP-grasp ligase (15).  
139 This highlights that different microbes can generate the same specialized metabolites through  
140 different biosynthetic routes, and therefore, we believe that our NPOmix tool will assist with  
141 the discovery of both novel metabolites as well as known metabolites with new biosynthesis.

## 142 Results and Discussion

143  
144 **The Natural Products Mixed Omics (NPOmix) Approach: Description of the Genomic and**  
145 **Metabolomic Pipelines.** To use the NPOmix approach (Fig. 1 shows a conceptual example using  
146 only four samples), it is required to have a dataset of paired genomic and MS/MS information.  
147 The genomic information can be either that of a genome or metagenome, and the MS/MS spectra  
148 should be obtained via untargeted LC-MS/MS. Paired datasets have become available at the  
149 Paired omics Data Platform (PoDP)(14), one of the first initiatives to gather paired genomic and  
150 MS/MS information. Using BiG-SCAPE (5), each biosynthetic gene cluster (BGC) in the genome to  
151 be queried undergoes a pairwise similarity comparison (Fig. 1A) to every other BGC in the query  
152 set (e.g., the set of genomes used for the training, for example, the genomes downloaded from  
153 the PoDP), and similarity scores are computed as “1 minus BiG-SCAPE raw distance” to assign  
154 BGCs to Gene Cluster Families (GCFs), if possible. In order to create a BGC fingerprint (Fig. 1C),  
155 we identify the similarity between the query BGC and each of the BGCs in each genome in the  
156 training dataset. The BGC fingerprint that emerges is a series of columns for each compared  
157 genome, the column value of which represents the similarity score between the query BGC and  
158 the BGC to which it is maximally similar in a given genome (column). Similarity scores range from  
159 0.0 to 1.0; identical BGCs have perfect similarity and are scored as 1.0 whereas a score of 0.8  
160 would indicate that a homologous BGC is present in the genome. A score below the similarity  
161 cutoff of 0.7 indicates that the queried BGC is likely absent in the genome. A similar process is  
162 used to create MS/MS fingerprints (Fig. 1B); a query MS/MS spectrum is compared to all of the  
163 MS/MS spectra in the query set. This query spectrum could be either a reference spectrum from  
164 GNPS (16, 17) or a cryptic MS/MS spectrum from a new sample that contains a sequenced  
165 genome and experimental MS/MS spectra. In the case of MS/MS fingerprints (Fig. 1D), GNPS  
166 molecular networking was used to calculate the pairwise modified cosine score and then the  
167 maximum similarity was identified between the query MS/MS spectrum and the many MS/MS  
168 spectra in each experimental sample. This analysis only used the GNPS functions that are  
169 required to calculate a modified cosine similarity score between a pair of MS/MS spectra. The  
170 BGC fingerprints were used to create a training matrix (Fig. 1E) where rows are the maximum

171 similarity scores for each BGC. Typically, this results in thousands of rows, and for our first release  
172 of NPOMix, we have captured this analysis for 5,421 BGCs that were present in 1,040 networked  
173 genomes/metagenomes (DNA samples can be downloaded using code from the GitHub  
174 repository, notebook 1), where each column is a genome and each value is the maximum  
175 similarity between the query BGC and the BGCs in this given genome. This BGC training matrix  
176 can be fed into the *K*-Nearest Neighbor (KNN) algorithm in order to train it with the genomic  
177 data. Additionally, one extra column is required in this BGC data matrix, a column that labels each  
178 BGC fingerprint with a GCF so the KNN algorithm will know the fingerprint patterns that belong  
179 together. The KNN algorithm plots the BGC fingerprints in the KNN feature space (in Fig. 1G). The  
180 KNN feature space is exemplified by only two dimensions as 1,040 dimensional space is not  
181 feasible to visualize (one dimension per sample). More details of how this multidimensional  
182 plotting occurs are described in the Fig. S1. where 3 BGCs are plotted in the three-dimensional  
183 space according to the scores from genomes A-C. The axis represent the genomes and the  
184 similarity values are coordinates in three-dimensional space. Next, the MS/MS fingerprints form  
185 a testing matrix (Fig. 1F), in this case, the matrix also contains 1,040 columns due to the 1,040  
186 sets of paired experimental MS/MS spectra (samples can be downloaded using the ftp links from  
187 Dataset S1, sheet two). For example, for our first release, this testing matrix contained 15 MS/MS  
188 fingerprints (rows) for MS/MS reference spectra from the GNPS database (also present at the  
189 PoDP). Each query MS/MS fingerprint (a row in the testing metabolomic matrix and columns are  
190 the experimental MS/MS spectra per sample) are plotted into the same KNN feature space (Fig.  
191 1G) so the algorithm can obtain the GCF labels for the nearest neighbors to the query MS/MS  
192 fingerprint (e.g., for three most similar BGC neighbors,  $k = 3$ ). We note that GCF labels can be  
193 present more than once in the returned list if two or more BGC nearest neighbors belong to the  
194 same GCF. This repetition on the GCF classification is a common behavior of the KNN approach.  
195 Our approach is suitable for bacterial, fungal, algal and plant genomes and MS/MS spectra  
196 obtained from the same organism. Metagenomes and metagenome-assembled genomes (MAGs)  
197 can also be used instead of genomes, however, complete genomes are preferred. This KNN  
198 approach also supports LC-MS/MS from fractions or from different culture conditions; multiple  
199 LC-MS/MS files for the same genome were merged together into a single set of experimental  
200 MS/MS spectra.

201

202

203

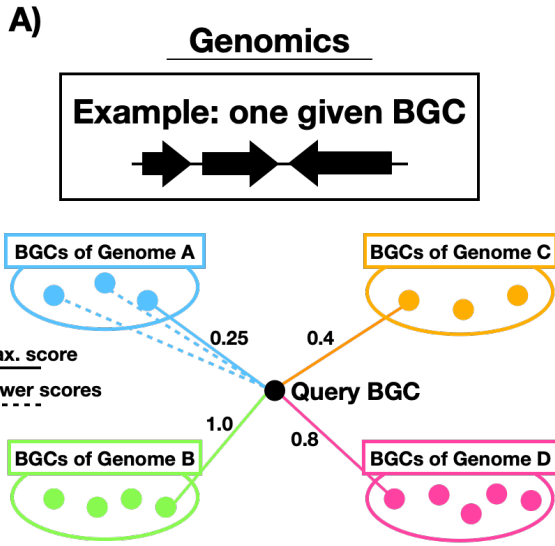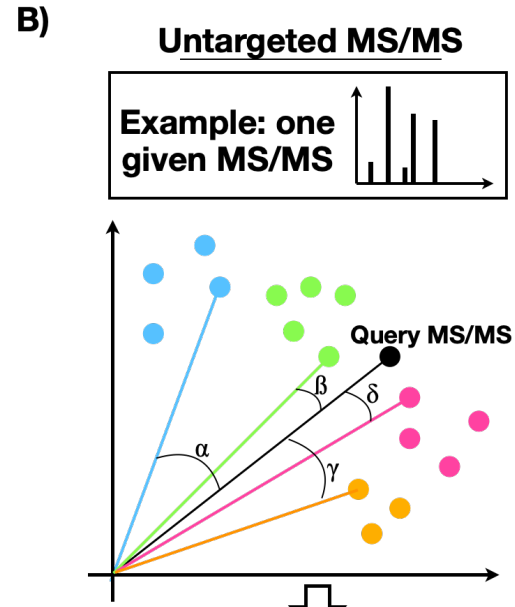

204

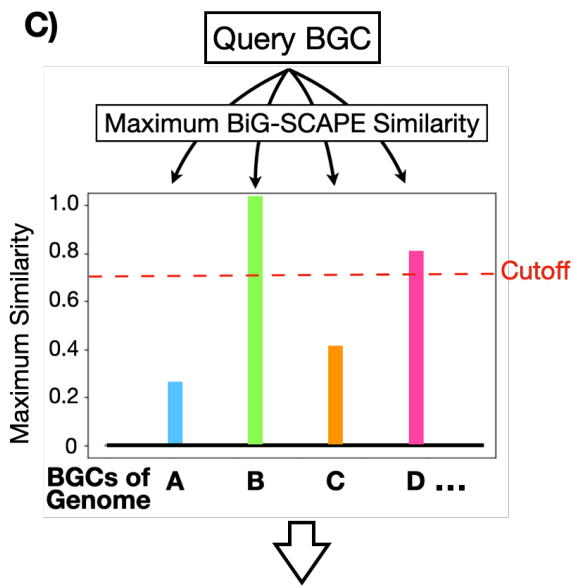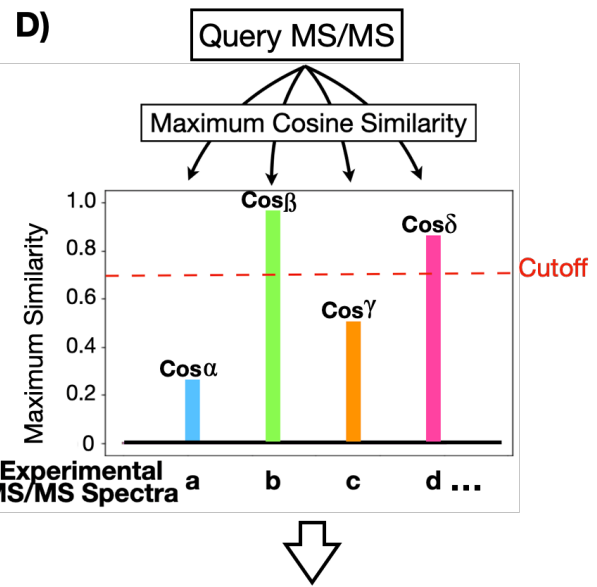

205

206

207

208

209

210

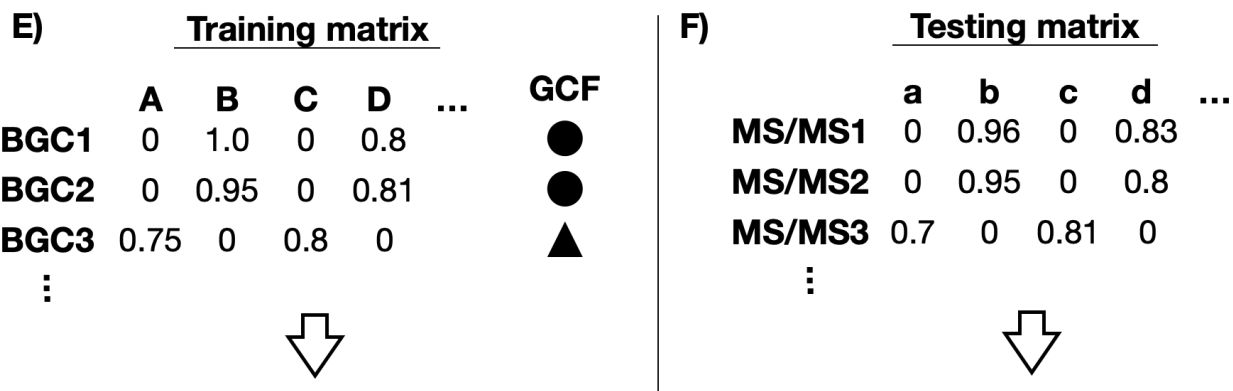

211

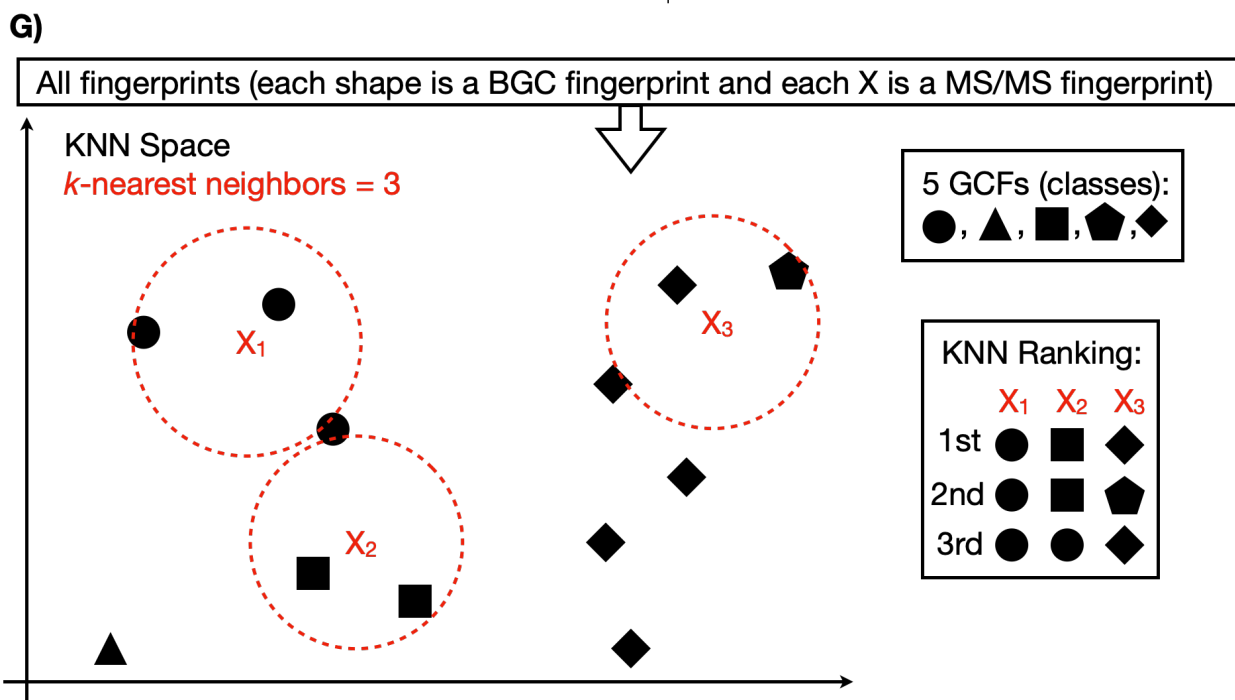

212

213

214

215

216

217

218

219

220

221

222

223

224

225

226

227

**Fig. 1.** The genomics and metabolomics pipelines to use the proposed KNN approach for a hypothetical dataset with 4 paired genomes-MS/MS samples. Representation of how to calculate the similarity scores between BGCs (A) and between MS/MS spectra (B). Schematic of how to create BGCs (C) and MS/MS (D) fingerprints using a paired genomics-metabolomics dataset of four samples (genomes, metagenomes or MAGs)(samples A-D) and similarity scores from BiG-SCAPE and GNPS. The dashed red line represents the selected cutoff of 0.7. The query BGC is highly similar to a BGC in sample B (indicating as identical BGC), while it is probably absent in sample A and C. The BGC fingerprints are grouped together in a training matrix (E) and the MS/MS fingerprints compose the testing matrix (F). All fingerprints are plotted in the multi-dimensional KNN space (G, here represented in only 2D for simplification) where each shape represents a BGC fingerprint and each X represents an MS/MS fingerprint. BGCs are labeled according to one of the five GCFs (five different shapes). KNN ranking of neighbors is based in the proximity between the query MS/MS fingerprint and the neighboring BGC fingerprints. In this example, a KNN = 3 (three closest neighbors) is depicted. BGC = biosynthetic gene cluster; MS/MS = mass fragmentation spectrum; KNN = K-Nearest Neighbor; BiG-SCAPE =

228 software to calculate pairwise BGC-BGC similarity; Cosine score = modified cosine score from  
229 GNPS to calculate pairwise spectrum-spectrum similarity.

230

231 **Cyanobacterial dataset: connecting a known metabolite (link validated experimentally) with a**

232 **cyanobacterial BGC.** Marine cyanobacteria living on coral reefs have resulted in the discovery

233 of many novel NPs (13, 18). We collected, sequenced and binned 60 cyanobacterial MAGs,

234 mainly from the NP rich genera of *Moorena*, *Okeania*, *Symploca*, *Leptolyngbya*, *Oscillatoria* and

235 *Spirulina* (13). Strains with good quality MAGs and paired LC-MS/MS data were published at

236 PoDP under the ID “864909ec-e716-4c5a-bfe3-ce3a169b8844.2”. We clustered 2,558 BGCs (not

237 including the BGCs from MIBiG) and we obtained high resolution LC-MS/MS for the same set of

238 marine cultures/environmental samples. Previous investigations (19–26) reported the discovery

239 of 8 cyanobacterial metabolites (Fig. 2) and their BGCs from a subset of these 60 marine

240 cyanobacteria. Hence, we used these 8 BGC-MS/MS links, with a total of 39 different MS/MS

241 spectra, to validate our KNN algorithm for a small, uniformly built and not so sparse dataset.

242 There are multiple spectra per compound due to different types of molecular ions (protonated,

243 sodiated, halogenated, etc.). From this relatively small dataset, we were already able to

244 connect one MS/MS spectrum to its correct BGC – curacin A (23), marked in red in Fig. 2 – thus

245 providing a fairly low precision of 1/39 (2.56%). However, the BGC fingerprints had a very small

246 number of similarity scores and it is expected that the fingerprints and the algorithm’s precision

247 would improve with a larger dataset with more complete BGCs (many of the 60 MAGs

248 contained several fragmented BGCs). Despite its low precision, this approach is already an

249 improvement over an earlier attempt that used a presence/absence Mantel correlation, as that

250 effort to connect genomes and metabolomes only yielded false positives for this same small

251 cyanobacterial dataset (Mantel correlation generated 51 GCF-MF links, all false positives).

252 Mantel correlation is an approach that combines two presence/absence matrices (one for

253 genomics and one for experimental MS/MS spectra) into a single output, creating a pairwise

254 association between a given row of the genomics matrix with a second row from the

255 metabolomics matrix. The Mantel correlation code is available in a Jupyter notebook found at

256 the GitHub repository: <https://github.com/tiagolbiotech/NPOmix>.

257



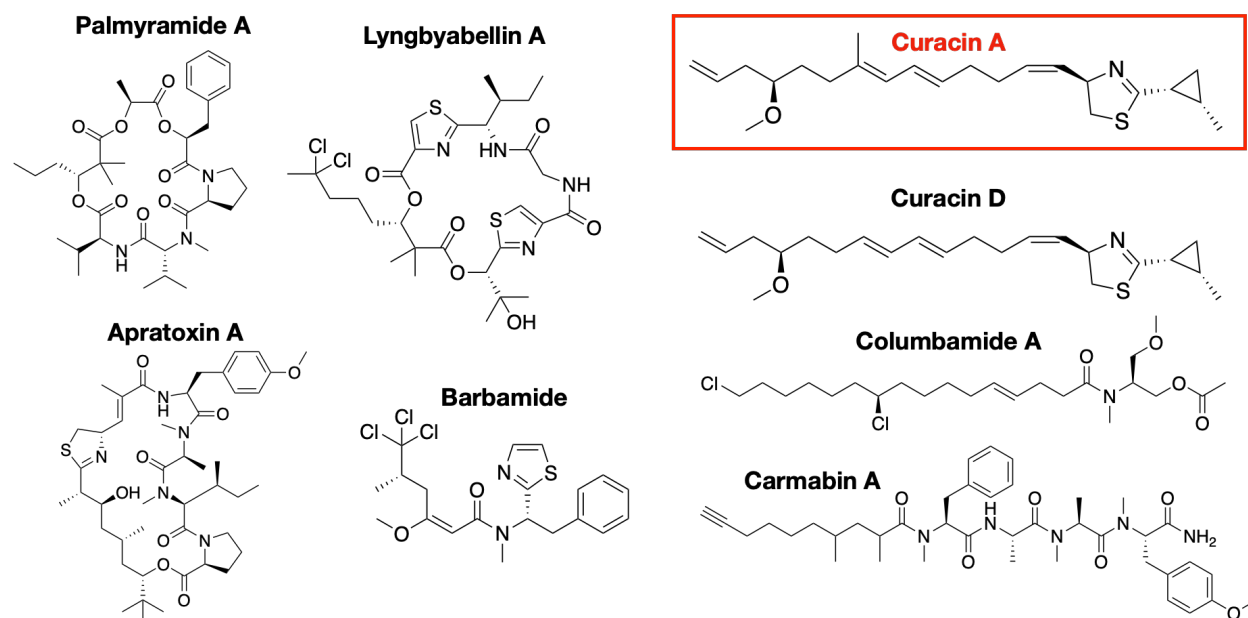

258  
259  
260  
261  
262  
263

**Fig. 2.** Structures of compounds used for validating links between BGC and MS/MS spectra for the 60 cyanobacterial samples. Highlighted in red is curacin A, the one correct link that was predicted via this KNN approach.

264 **PoDP dataset: connecting known metabolites (links validated experimentally) to PoDP BGCs.**

265 To further validate our NPOMix approach, we used 36 out of 71 datasets from the PoDP (from  
266 February 2021, listed at Dataset S1, sheet one). We selected genomic samples that contained a  
267 valid Genome ID or BioSample ID to aid their downloading from the NCBI database and totaling  
268 732 genomes/MAGs obtained from these 36 metadatasets. We also selected and assembled  
269 1,034 metagenomes from two major metagenomic datasets: 1) MSV000082969 and PoDP ID  
270 cd327ceb-f92b-4cd3-a545-39d29c602b6b.1 - 556 cheetah fecal samples and environmental  
271 samples; 2) MSV000080179 and PoDP ID 50f9540c-9c9c-44e6-956c-87eabc960d7b.3 - The  
272 American Gut Project (27) that contains fecal samples from 481 human subjects. These  
273 (meta)genomes were automatically downloaded with the code shared at the GitHub repository  
274 <https://github.com/tiagolbiotech/NPOMix>, notebook 1. The LC-MS/MS files can be downloaded  
275 using “ftp” from links found at Dataset 1, sheet two. We were able to cluster 1,040  
276 (meta)genomes that contained 5,681 BGCs (including 260 BGCs from the MIBiG database)  
277 distributed into 997 GCFs. In the untargeted metabolomics data, we matched 3,248 LC-MS/MS  
278 files to 15 GNPS (16, 17) reference library spectra in order to create the MS/MS fingerprints for  
279 testing the KNN classification (one fingerprint per spectra). In the near future, we envision  
280 creating a balanced, diverse and less sparse training dataset. To maximize precision rates in the  
281 future, we plan to purchase cultures from collections that have well assembled genomes so we  
282 can obtain the paired LC-MS/MS. However, the current dataset produced highly supportive  
283 results by testing validated links from the PoDP, links generated by the Gerwick lab dataset, and  
284 validated links used in the NPLinker publication (10). We attempted to test all 242 metabolite-  
285 BGC links from NPLinker (totaling 2,069 unique MS/MS spectra, Dataset S1, sheet four), 109  
286 manually added MS/MS spectra (connected to BGCs, annotated by experts at the PoDP, Dataset  
287 S1, sheet three) and 406 MS/MS spectra from metabolites isolated by the Gerwick lab.  
288 Although, most of these validated links were not present in the 1,040 paired (meta)genomes-  
289 MS/MS samples from the PoDP (as NPLinker used BGCs from MIBiG and not PoDP) or their BGC  
290 scores did not co-occur with their MS/MS scores because they were not present in the same  
291 sample. Hence, our validation dataset was limited to 8 validated links found in the paired  
292 (meta)genomes-MS/MS samples (orfamides, albicidins, bafilomycin, nevaltophin D,  
293 jamaicamide, hectochlorin, palmyramide and cryptomaldamide, totaling 15 reference MS/MS  
294 spectra that were present in the GNPS database). We stress that a larger training dataset with  
295 more complete genomes is likely to increase the size of the validation set by adding more valid  
296 BGCs into the analysis. We also combined the NPOMix program with *in silico* tools like  
297 Dereplicator+ (28) to make new links between MS/MS spectra, BGCs and molecular structures.  
298 This was accomplished by annotating cryptic MS/MS spectra (without a GNPS library hit and  
299 therefore not present in either the GNPS or the PoDP databases) to known BGCs. Such new  
300 links could be confirmed experimentally to improve the size of the validation set, as well as to  
301 expand MS/MS databases by adding these cryptic spectra to them.

302 A two-dimensional comparison of both types of fingerprints (BGC and MS/MS) can be a  
303 proxy for distinguishing some true positives from false positives. As observed in Fig. S2, we can  
304 visualize a mismatch between the BGC fingerprints (one GCF) and the MS/MS fingerprint in the  
305 “reduced” KNN-space (represented schematically in only two dimensions), indicative of a  
306 possible false positive link. This GCF is dereplicated as the known metabolite, pyocyanin, and it  
307 was incorrectly associated with the metabolite 2,4-diacetylphloroglucinol, confirming the false

308 positive (at  $k = 3$ ). In contrast, Fig. 3 illustrates that 5 metabolites, 2 albicidins and 3 albicidin  
309 analogs, could be correctly assigned to their corresponding GCF that contains 2 BGCs. In this  
310 case, the BGC fingerprints match the MS/MS fingerprints (Fig. 3C, 3D). Using this second larger  
311 dataset comprised of 1,040 samples instead of only 60 yielded a precision of 66.7% as 10 out of  
312 15 reference MS/MS spectra were correctly labeled when top- $n = 3$  ( $k$  also equal to 3). Top- $n$   
313 represents how often the correct GCF label was found among the top  $n$  labels classified by the  
314 KNN approach (see Tables 1 and 2). The observed precision was much higher than with the  
315 cyanobacterial dataset because the PoDP dataset has a larger number of samples and it also  
316 contains a larger diversity of microbial entries thus providing fingerprint-based approaches  
317 more resolution. Lastly, we regard our NPOMix approach as multi-omics enabled dereplication  
318 because the 5 MS/MS albicidin labels were automatically assigned to a known GCF that  
319 confirmed their metabolite labels, thereby minimizing the necessity to purchase standards, to  
320 perform isolation and NMR characterization, gene knockout or heterologous expression.  
321

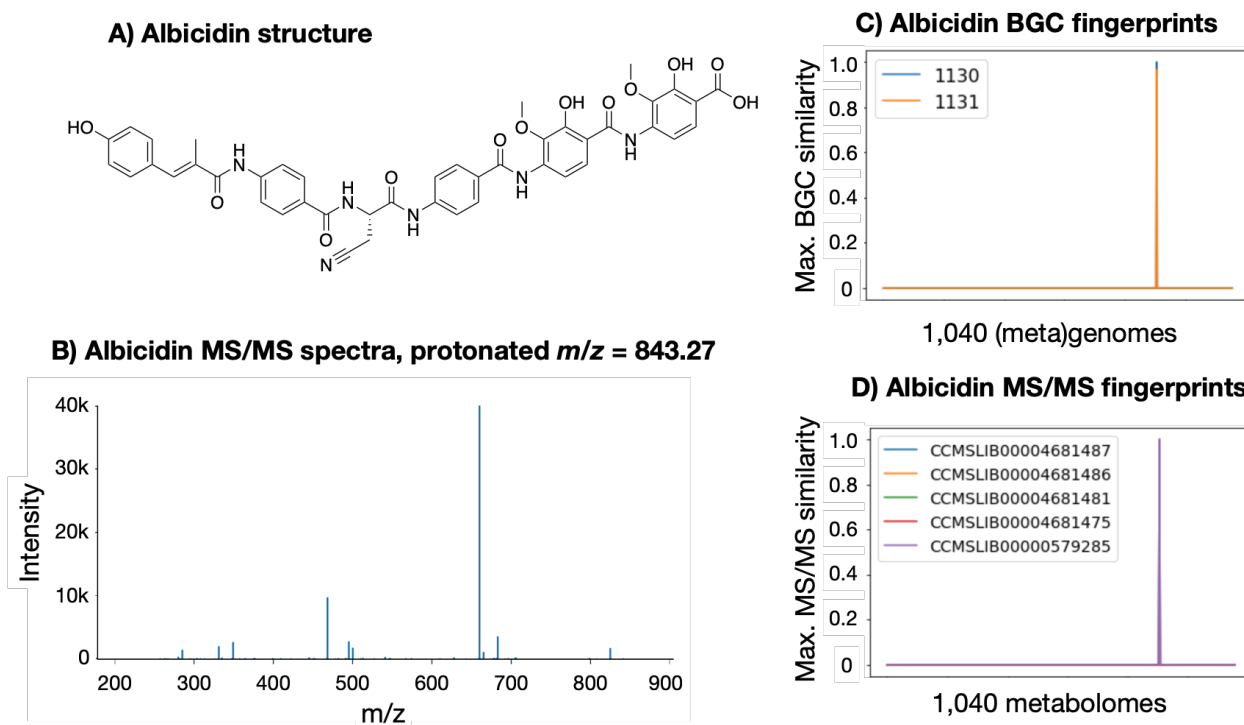

322  
323 **Fig. 3.** Multi-omics enabled dereplication of albicidin by automatically predicting a true BGC-  
324 metabolite link. Structure of the dereplicated metabolite (A) and its corresponding  
325 representative MS/MS spectrum (B, spectrum example from GNPS ID CCMSLIB00000579285  
326 and  $m/z$  of 843.27), obtained via Metabolite Spectrum Resolver (29). The two BGC fingerprints  
327 (1130 and 1131) are represented in a 2D plot (C) and they match the 2D plot for the 5 MS/MS  
328 fingerprints obtained from GNPS for albicidin and its analogs (D). BGC = biosynthetic gene  
329 cluster; MS/MS = mass fragmentation spectrum;  $m/z$  = mass over charge calculated via mass  
330 spectrometry.  
331

332 **Connecting analogs to BGCs: the example of orfamide C.** An NPOmix link can be further  
333 confirmed by matching the AA predictions from the BGC with the structure prediction for the  
334 query metabolite based on library match or *in silico* annotations (Fig. 4). For example, the BGC  
335 (genes 1-6 in Fig. 4) for the metabolite orfamide C (MIBiG ID BGC0000399) was automatically  
336 connected by our KNN approach to a GNPS metabolite labeled “putative orfamide C”  
337 (CCMSLIB00004679300). This MS/MS spectrum was obtained from the same strain where the  
338 BGC was first identified (*Pseudomonas protegens* Pf-5, Genbank ID GCA\_000012265)(30). The  
339 nine amino acid (AA) predictions for this BGC, based on the specificity of adenylation domains,  
340 match the structure for orfamide C in the correct order: leu, asp, thr, ile, leu, ser, leu, leu and  
341 ser. AntiSMASH was not able to predict the tenth and last in the biosynthetic series, namely  
342 valine. The matching between the predicted structures confirmed the multi-omics enabled  
343 dereplication of orfamide C (using  $k = 3$ , BGC predictions and predicted metabolite structure are  
344 represented in Fig. 4). The KNN GCF predictions do not use structures/substructures for linking  
345 MS/MS spectra to BGCs; hence, as demonstrated in Fig. 4, these substructure predictions can  
346 be an extra dimension for selecting links that are true positives over false positives.

347 We have determined that the use of three neighbors is the optimal performance,  
348 providing a good balance between precision and number of links to validate (top-3 = 66.7% and  
349 randomness equal to 0, as detailed in Table 1). Randomness is observed by shuffling the testing  
350 columns, experimental MS/MS names, and counting how many correct links are present  
351 between the top- $n$  GCF candidates. This parameter ( $n$  and  $k = 3$ ) enabled the dereplication of  
352 the albidicins, orfamides B-C, jamaicamides A and C and cryptomaldamide, totaling 4 different  
353 metabolite families (and analogs) that were correctly predicted by our KNN approach using the  
354 PoDP dataset. Noteworthy, the top-10 precision had a maximum score of 73.33% with  
355 randomness still equal to 0. However, 10 GCF candidates is practically too large for useful  
356 genome mining as all those candidates would need to be tested experimentally. We expect that  
357 our approach will improve with a larger training set and with further improvement of the  
358 features in the BGC and MS/MS fingerprints (e.g., based on substructure presence/absence).  
359 The 15 BGC-MS/MS validated links reported herein and their predictions using  $k = 3$  are found  
360 in Table 2 that provides the GCF labels for the three closest BGCs to a given MS/MS fingerprint  
361 (the 10 correct GCF predictions are colored red and highlighted in bold). We confirm that all 10  
362 correct GCF predictions reported here were found in the original producer of the identified  
363 metabolites and they matched the reported masses. With 49 known GCF-MS/MS links were  
364 present in the 1,040 samples with paired data, the annotation rate was reasonably high (around  
365 30%, 15 out of 49 links were retained after the co-occurrence filter, a filter to keep only the  
366 metabolites that are found among the same samples that contain the candidate BGCs).  
367

368

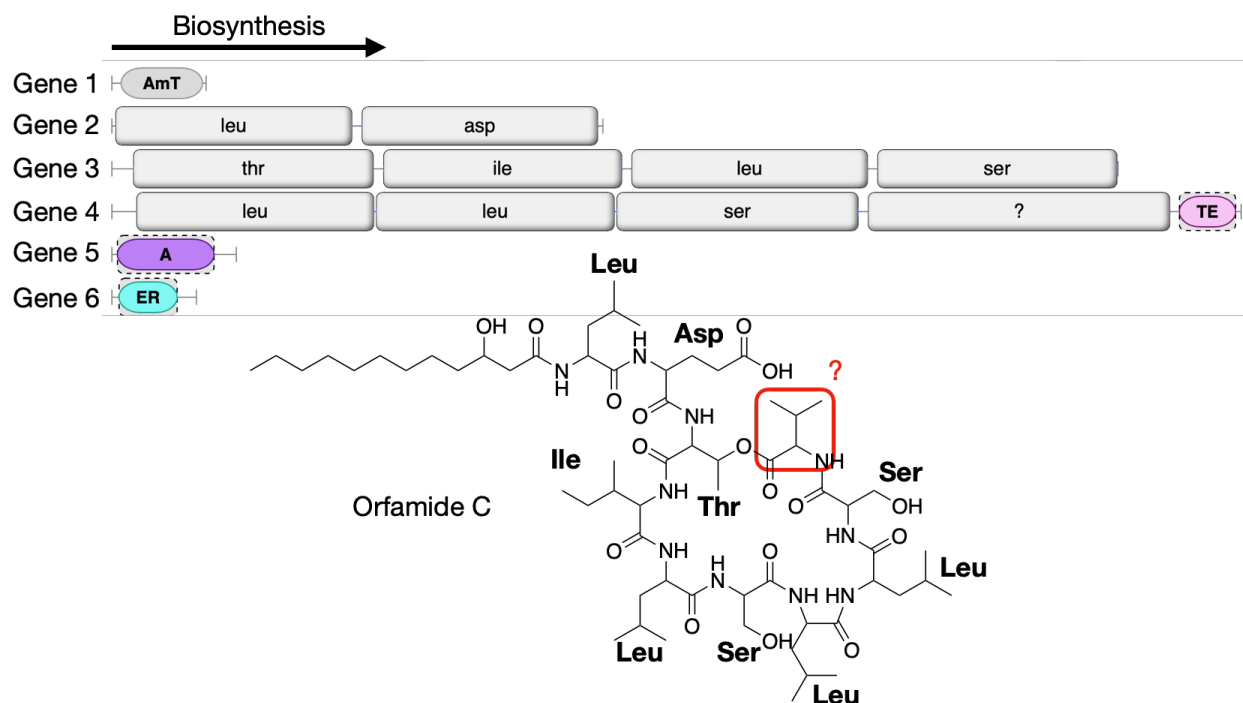

369  
370 **Fig. 4.** NPOMix automatically connected an MS/MS spectrum annotated as “putative orfamide  
371 C” to the MIBiG BGC annotated as orfamide C. The figure illustrates the matches between the  
372 BGC’s AA predictions (via antiSMASH) and the predicted metabolite structure (orfamide C,  
373 predicted via MS/MS spectral matching). Only one AA (valine, in red) out of 10 AA could not be  
374 predicted by the BGC annotation tool (antiSMASH), however, this valine residue was predicted  
375 by the MS/MS spectrum. BGC = biosynthetic gene cluster; AA = amino acid; AmT =  
376 aminotransferase; TE = thioesterase; A = adenylation domain; ER = enol reductase; “?” in the  
377 BGC represents that one AA could not be predicted by antiSMASH.  
378  
379

380 **Table 1.** Top- $n$  precision scores (how often the correct GCF label was found among the top  $n$   
 381 labels classified by the KNN approach) for 15 reference GNPS MS/MS spectra connected to a  
 382 BGC found in the paired 1,040 (meta)genomes-MS/MS downloaded from the PoDP. These links  
 383 were obtained from the NPLinker dataset, GNPS and PoDP databases. Randomness is observed  
 384 by shuffling the testing columns, experimental MS/MS names, and counting how many correct  
 385 links are present between the top- $n$  GCF candidates. Based on this, we believe the best  
 386 performance is  $n = 3$  for the examined dataset.  
 387

|        | Top-1  | Top-3  | Top-5  | Top-10 | Top-50 | Top-100 |
|--------|--------|--------|--------|--------|--------|---------|
| Data   | 46.66% | 66.66% | 66.66% | 73.33% | 73.33% | 73.33%  |
| Random | 0%     | 0%     | 0%     | 0%     | 0%     | 20%     |

388  
 389 **Table 2.** 15 links between GNPS MS/MS spectra (with CCMS metabolite ID) and networked gene  
 390 cluster family (true GCF). The table also includes their KNN predictions ( $k = 3$ ); the predicted  
 391 GCFs are ordered according to the value for  $k$ , from 1 (nearest) to 3 (furthest), and the first  
 392 correct family is marked in bold red font. GCF labels can be repeated because multiple BGCs  
 393 from the same GCF can be predicted as the nearest neighbors. Classification is considered  
 394 correct if the true GCF is among the top-3 candidates. Annotations are according to each MIBiG  
 395 BGC(s) found in the true GCFs. The “orphan” label indicates that the BGC was not networked in  
 396 the current dataset.  
 397

| CCMS metabolite ID  | True GCF | Predicted GCFs for $k = 3$     | Annotation                       |
|---------------------|----------|--------------------------------|----------------------------------|
| CCMSLIB00000479759  | GCF320   | GCF122, GCF115, GCF112         | Bafilomycin                      |
| CCMSLIB00000579285  | GCF476   | <b>GCF476</b> , GCF180, GCF476 | Albicidin                        |
| CCMSLIB00000840594  | GCF488   | GCF740, GCF740, GCF739         | Nevaltophin D                    |
| CCMSLIB00004679298  | GCF450   | GCF465, GCF445, GCF439         | Orfamide A                       |
| CCMSLIB00004679299  | GCF450   | GCF465, GCF445, <b>GCF450</b>  | Orfamide B                       |
| CCMSLIB00004679300  | GCF450   | GCF465, GCF445, <b>GCF450</b>  | Orfamide C                       |
| CCMSLIB00004681475  | GCF476   | <b>GCF476</b> , GCF180, GCF476 | Propionyl-albicidin              |
| CCMSLIB00004681481  | GCF476   | <b>GCF476</b> , GCF180, GCF476 | Beta-methoxy-albicidin           |
| CCMSLIB00004681486  | GCF476   | <b>GCF476</b> , GCF180, GCF476 | Carbamoyl-beta-methoxy-albicidin |
| CCMSLIB00004681487  | GCF476   | <b>GCF476</b> , GCF180, GCF476 | Albicidin                        |
| CCMSLIB00000001706  | GCF471   | <b>GCF471</b> , GCF498, GCF471 | Jamaicamide A                    |
| CCMSLIB000005724004 | GCF498   | GCF471, <b>GCF498</b> , GCF471 | Cryptomaldamide                  |
| CCMSLIB00000001553  | Orphan   | GCF471, GCF498, GCF471         | Hectochlorin                     |
| CCMSLIB00000001751  | Orphan   | GCF471, GCF498, GCF471         | Palmyramide A                    |
| CCMSLIB00000001708  | GCF471   | <b>GCF471</b> , GCF498, GCF471 | Jamaicamide C                    |

398  
 399  
 400  
 401

402 **Connecting cryptic metabolites (without GNPS library matches) to BGCs: the example of**  
403 **brasilicardin A.** We used a combination of MS/MS fingerprints (notebook 2), BGC fingerprints  
404 (notebook 3), MZmine (31) and Dereplicator+ (28) in order to annotate brasilicardin A. This  
405 approach differs from the previous NPOMix analysis because it uses MZmine to select the  
406 MS/MS spectra instead of collecting spectra from the GNPS and PoDP databases. After selecting  
407 300 MS/MS spectra from the 16 most diverse genomes in the dataset with 1,040 samples,  
408 Dereplicator+ had three *in silico* predictions and one of them was the unique tricyclic  
409 glycosylated terpene brasilicardin A. The observed  $m/z$  matches the value previously reported  
410 in the literature(32), identifying an MS/MS spectrum that is currently absent from both the  
411 GNPS and the PoDP databases. NPOMix connected the MS/MS spectrum (predicted to be  
412 brasilicardin A by Dereplicator+, information not used in the NPOMix training) with the correct  
413 BGC (brasilicardin A MIBiG ID BGC0000632 from the strain *Nocardia terpenica* IFM 0406,  
414 GenBank ID GCA\_001625105)(33), highlighting how NPOMix can connect cryptic molecules  
415 without library matches (absent from MS/MS databases) to their corresponding BGCs.  
416 Predicted fragmentation (Fig. S3 and table with deltas in Dataset S1, sheet seven) strongly  
417 suggests that the query MS/MS spectrum is indeed brasilicardin A (all differences between  
418 exact  $m/z$  and observed  $m/z$  were extremely low). This pipeline provided additional 70 links  
419 between cryptic MS/MS spectra and BGCs from the most diverse strains (links listed at Dataset  
420 S1, sheet six) and potentially new BGCs can be explored experimentally (e.g., BGC knock-out,  
421 heterologous expression or isolation and NMR structure elucidation), especially if coupled to  
422 NMR SMART analysis (34, 35) to confirm their novelty.

423  
424 **Improving the fingerprint for known metabolites using biosynthetic class.** In order to increase  
425 the precision of our NPOMix algorithm, we added the biosynthetic classes (PKSs, NRPSs,  
426 terpenes, siderophores, RiPPs, phosphonates, oligosaccharides, phenolic metabolites,  
427 others/unknowns and other minor classes) to the BGC and MS/MS fingerprints as  
428 presence/absence in the training set (5,681 BGCs). For example, if a given BGC is a hybrid PKS-  
429 NRPS, it was annotated as 1 in the PKS and NRPS columns, and with a 0 in the remaining classes  
430 (additional columns). For the MS/MS fingerprints in the validation set (testing set), we manually  
431 annotated these same features (biosynthetic classes) because the structures for these testing  
432 MS/MS spectra were known. In cases where the structure is unknown, tools like CANOPUS (36)  
433 and MolNetEnhancer (37) can provide a similar biosynthetic class prediction, and these  
434 predictions can be further confirmed using substructures predicted with unsupervised tools like  
435 MS2LDA (38) or dedicated tools like MassQL (based on specific MS/MS fragments found in the  
436 spectra, manuscript in preparation) or CSI:FingerID via SIRIUS 4 (39). As observed in the  
437 precision curves from Fig. S4 for version 1.0 (fingerprints without biosynthetic classes) and  
438 version 2.0 (fingerprints with biosynthetic classes), the precision increased for top-3 and top-5  
439 testing results, for top-3 it increased from 66.66% without the biosynthetic class (good score  
440 with a lower number of GCF candidates than top-10) to 73.33% with the biosynthetic class  
441 added, requiring less GCF candidates to obtain a similar precision as the top-10 without  
442 inclusion of the biosynthetic class. Consequently, we observed a better ranking of the predicted  
443 GCFs when the new class features were added.

444

## 445 Conclusion

446

447 We created a machine learning solution, a K-Nearest Neighbors algorithm named  
448 NPOmix, to connect specialized metabolites observed by untargeted mass spectrometry to  
449 their biosynthetic gene clusters (BGCs). We demonstrated that the tool performs reasonably  
450 well for a small dataset that was sequenced and collected in a uniform fashion; in this case, the  
451 dataset was constructed from 60 marine cyanobacterial samples with MAGs and high  
452 resolution untargeted LC-MS/MS spectra. These were mostly from tropical marine  
453 cyanobacteria, which are known to be rich producers of NPs. Nevertheless, performance was  
454 limited by the small size of the dataset of good cyanobacterial genomes. We showed that a  
455 larger dataset, deriving from heterogeneous sources such as the ones currently available in the  
456 Paired omics Data Platform (PoDP), can create better fingerprints and can thus more  
457 successfully connect known metabolites to their corresponding BGCs, such as albicidin and its  
458 analogs to a BGC in *Xanthomonas albilineans* GPE PC73 (GenBank ID GCA\_000087965.1),  
459 orfamides A-C to a BGC in *Pseudomonas protegens* Pf-5 (GCA\_000012265), and  
460 cryptomaldamide and jamaicamide A and C to BGCs in *Moorena producens* JHB  
461 (GCA\_001854205). All three of these strains were the original producers of these metabolites.  
462 In Fig. 4, we illustrated how the BGC predictions (such as predicted moieties) can help to  
463 prioritize true links over false positives via matching of predicted structures between a given  
464 MS/MS spectrum and its BGC candidates.

465 In this work we demonstrated the use of machine learning and genome mining to  
466 process several thousand LC-MS/MS files and a thousand genomes to connect MS/MS spectra  
467 to GCFs. Our approach can systematically connect MS/MS spectra from known metabolites  
468 (links validated experimentally), spectra from metabolites analogous to known (links with GNPS  
469 library matches) and spectra from cryptic metabolites (links without GNPS library matches and  
470 therefore absent from the MS/MS database, as exemplified by brasilicardin A). The advantage  
471 of using paired data is that the genomic information represents the full metabolic potential of  
472 an organism, and hence, we can prioritize the discovery of the most diverse BGCs via genome  
473 mining. Additionally, the use of genetic information can help in the structure elucidation and  
474 prediction of bioactivity (40), highlighting the advantage of using the BGC information in the  
475 drug discovery process. Moreover, predicting linked MS/MS spectra for a promising BGC can  
476 facilitate their heterologous expression as expression can be difficult if the target molecule is  
477 not known. Furthermore, we show how cryptic MS/MS spectra (absent from MS/MS databases  
478 like GNPS) can be annotated using NPOmix, MZmine (31) and Dereplicator+ (28), allowing  
479 expansion of the current MS/MS databases. We also demonstrated how our methodology is  
480 suitable for linking cryptic MS/MS spectra with putative BGC candidates that can assist in the  
481 isolation of novel natural product scaffolds. Despite the relatively small size of the training  
482 dataset (in comparison to other machine learning approaches, 1,040 paired samples and 5,681  
483 BGCs from the PoDP database), we observed good precision scores of top-3 = 66.66% and top-  
484 10 = 73.33% (both with randomness equal to 0). By including the biosynthetic class in the  
485 fingerprints, the best precision score was top-3 = 73.33%. In effect, this latter analysis required  
486 less GCF candidates to obtain a similar precision as the top-10 without inclusion of the



487 biosynthetic class. We observed an annotation rate of around 30%, as 15 out of 49 GCF-MS/MS  
488 validated links were retained after the co-occurrence filter.

489 The use of complete genomes over MAGs and metagenomes is preferred to create a  
490 more “complete” training set; we predict that this would result in better precision than if the  
491 training set is populated with several fragmented BGCs. Our results highlight the importance of  
492 making genomics and metabolomics data publicly available with curated metadata, because  
493 more available paired data would enable better training of models, and therefore, better tools  
494 for the research community. Future plans include the testing of other similarity metrics for  
495 networking and fingerprinting such as BiG-SLICE (41) for genomics and Spec2Vec (42) and  
496 MS2DeepScore (43) for the metabolomics. We will also look for synergy with correlation scores  
497 from NPLinker to better annotate paired datasets. We intend to implement structure and  
498 substructure predictions from the MS/MS fragmentation spectra using tools like SIRIUS 4 (39),  
499 MS2LDA (44), MolNetEnhancer (37) or CANOPUS (36), prioritizing candidates that have several  
500 substructures or predicted chemical compound classes matching between BGCs and MS/MS  
501 spectra. The GNPS molecular family information could be used to select a consensus prediction  
502 among different MS/MS spectra from the same family. The BGCs assembled from the  
503 metagenomic samples could be improved using tools like metaBGC (45) and BiG-Mex (46).  
504 Enrichment of the current Paired Omics Data Platform dataset (we could now use 1,040 PoDP  
505 samples) with higher quality samples as well as more validated BGC-MS/MS links will further  
506 drive the development of tools such as NPOMix, and this will spark the discovery of more novel  
507 NPs. Furthermore, machine learning can be used to connect promising BGCs with their  
508 biological activities (anticancer, antimicrobial and antifungal)(40). Finally, we would like to  
509 stress that all true positive BGC-MS/MS validated links reported here were found in the original  
510 producer of the metabolites and they matched the reported masses. We expect that NPOMix is  
511 a promising tool to search for new natural products in paired omics data of natural extracts by  
512 using links between cryptic MS/MS and putative BGCs. This will, for example, facilitate the use  
513 of genome mining in drug discovery pipelines.

514

## 515 Code and Data Availability

516

517 The code (a collection of Jupyter notebooks) required to reproduce this work and to use  
518 the NPOMix tool for new samples can be found in the following GitHub repository page:  
519 <https://github.com/tiagolbiotech/NPOMix>. The repository also includes short video  
520 explanations on how the tool works and its importance for natural product discovery. The  
521 (meta)genomes used to create the NPOMix training dataset for validation were downloaded  
522 from the Paired omics Data Platform (PoDP)(14) using notebook 1 from the GitHub repository.  
523 The paired experimental MS/MS files were downloaded using the ftp links (also from the Paired  
524 omics Data Platform) found in Dataset S1, sheet two. The testing set included MS/MS spectra  
525 from PoDP, spectra from the Global Natural Products Social Molecular Networking database  
526 (GNPS)(16) and also spectra used in the NPLinker dataset (10). If the potential users find the  
527 tool challenging to run, we have our contact information at the GitHub web page (link above) to  
528 submit samples and we expect that promising results will lead to fruitful collaborations. In the  
529 near future, we will have a web-based interface for direct submission of samples.

## 530 Author Contributions

531

532 T.F.L. conceptualized the software; T.F.L., R.d.S. and A.B (Asker Brejnrod) programmed  
533 the software; M.W. assembled the metagenomic reads and annotated all biosynthetic gene  
534 clusters; E.G. cultured cyanobacterial samples and collected the cyanobacterial LCMS data; A.B.  
535 (Anelize Bauermeister) developed the predicted fragmentation for brasilicardin A; T.F.L,  
536 J.J.J.v.d.H. and M.W. curated the dataset; T.F.L, J.J.J.v.d.H. and A.B. (Anelize Bauermeister)  
537 wrote the manuscript; L.G., W.H.G, N.B. and P.C.D. funded and designed the research; L.G.,  
538 W.H.G, N.B. and P.C.D. edited the manuscript; all authors read, reviewed and agreed to the  
539 published version of the manuscript.

540

## 541 Acknowledgements

542

543 This research was supported by National Institutes of Health (NIH) Grants GM107550 (to  
544 P.D., W.H.G. and L.G.) and GM118815 (to W.H.G. and L.G.). This work was supported in part by  
545 a seed grant from the Center for Microbiome Innovation at University of California San Diego.  
546 R.S. was supported by the São Paulo Research Foundation (Awards FAPESP 2017/18922– 2 and  
547 2019/05026–4). J. J. J. v. d. H. was supported by the Netherlands eScience Center (ASDI  
548 eScience grant ASDI.2017.030).

549

## 550 Conflict of Interest

551

552 W.H.G. has an equity interest in NMRFinder and in SirenasMD Inc., companies that may  
553 potentially benefit from the research results and W.H.G. also serves on the companies'  
554 Scientific Advisory Boards. The terms of this arrangement have been reviewed and approved by  
555 the University of California San Diego in accordance with its conflict of interest policies. P.C.D. is  
556 a scientific advisor to SirenasMD Inc., Galileo and Cybele, and cofounder and scientific advisor  
557 to Ometa and Enveda with approval by the University of California San Diego. M.W. is a  
558 cofounder of Ometa Labs, LLC.

## 559 Methods

560

561 **Obtaining paired data.** Sixty cyanobacterial samples were collected via SCUBA diving or  
562 snorkeling along coastal shores around the globe and subjected to processing as described by  
563 Leao *et al.*, 2021, (13). High quality genomes were published at NCBI database and LC-MS/MS  
564 data were collected for the same set of samples, also as described by Leao *et al.*, (2021)(13).  
565 The paired data is available at the PoDP (ID “864909ec-e716-4c5a-bfe3-ce3a169b8844.2”). We  
566 automatically downloaded the paired (meta)genomics-metabolomics data from the samples in  
567 the PoDP according to the code in the notebook 1 at the GitHub repository described below.  
568 The cyanobacterial high resolution LC-MS/MS data was obtained according to the methods in  
569 by Luzzatto-Knaan *et al.* (47).

570

571 **Genome assembly and annotation, BGC and MS/MS similarity calculation.** Metagenomic  
572 reads were assembled with SPAdes 3.15.2. (48). For BGC annotation, we used antiSMASH 5.0  
573 (49) and for gene cluster networking we used BiG-SCAPE 1.0 (similarity cutoff of 0.7) (5). BiG-  
574 SCAPE raw distance is measured via the domain sequence similarity (DSS) index, an index that  
575 calculates the Pfam domain copy number differences and sequence identity (5). For networking  
576 metabolites, we used GNPS classical molecular networking release 27 (similarity cutoff of 0.7).  
577 We did not use the full classical molecular networking capabilities in the NPOmix approach, as  
578 only the functions required to calculate a modified cosine score between a pair of MS/MS  
579 spectra were needed.

580

581 **Creating fingerprints.** We developed python scripts and we combined with scripts from sklearn  
582 (<https://scikit-learn.org/stable/index.html>) to create both BGC and MS/MS fingerprints and to  
583 run the KNN algorithm. A BGC fingerprint is created by pairwise BiG-SCAPE comparison  
584 between the queried BGC and all the BGCs found in the (meta)genomes in the training set,  
585 selecting the highest similarity scores for each (meta)genomes. An MS/MS fingerprint (part of  
586 the testing set) is created by pairwise modified cosine comparison between the queried MS/MS  
587 and all the MS/MS present in the LC-MS/MS files paired with the genomes from the training  
588 set, also selecting only the highest similarity scores per set of experimental MS/MS spectra.

589

590 **Jupyter notebooks.** All scripts used in this research can be found at this GitHub repository:  
591 <https://github.com/tiagolbiotech/NPOmix>. Notebook 1 can be used to download  
592 (meta)genomes and metagenome-assembled genomes (MAGs) that contain paired untargeted  
593 metabolomics (LC-MS/MS)(metabolomic files will also be downloaded by the notebook). We  
594 selected genomic samples that contained a valid Genome ID or BioSample ID, resulting in 732  
595 genomes/MAGs. We also selected and assembled 1,034 metagenomes. Notebook 2 can be  
596 used to process downloaded metabolomics files and a selected set of “.mgf” reference MS/MS  
597 spectra, creating a matrix containing the MS/MS fingerprints for the selected set of reference  
598 spectra (reference MS/MS spectra for the validation but for using the tool these reference  
599 spectra will be replaced by cryptic MS/MS spectra). If there are more than one LC-MS/MS file  
600 per genome (for example different media conditions or different chemical fractions), these files  
601 were merged into a single file representing these experimental MS/MS spectra. Notebook 3 can

602 be used to process the antiSMASH results to create BGC fingerprints and use those to train the  
603 KNN algorithm. The MS/MS fingerprints are used to predict a/multiple GCF(s) for each tested  
604 reference MS/MS spectra found in the paired genomes-MS/MS data. We filtered the GCF-  
605 MS/MS links for cases that the top GCF candidate had co-occurrence (GCF and MS/MS scores  
606 were present in the same set of samples, as illustrated in Fig. 3C and 3D). Notebook 3 also  
607 performs cross-validation (dividing the data into 5 parts) and the average precision score for  
608 the cross-validation was 56.9%. Notebook 4 can be used to generate metadata such as the type  
609 of GCF or the count of BGCs per each genus in the database. The code for making the Mantel  
610 correlation, an approach that combines two presence/absence matrices, can be found in  
611 notebook 5. Notebook 6 presents the code for genome mining that yielded the annotation of  
612 brasilicardin A (more details below). Notebook 7 expanded the similarity/absence fingerprints  
613 by including the biosynthetic class (NPOMix version 2.0).

614  
615 **Genome mining for new MS/MS spectra using Dereplicator+ and NPOMix.** In order to use the  
616 NPOMix approach to find new NPs without any GNPS library matches (absent from the MS/MS  
617 database), we developed a pipeline combining NPOMix, MZmine (31) and Dereplicator+ (28).  
618 First, a number of strains were selected using MZmine, here exemplified with 16 strains, based  
619 on their BGC beta-diversity scores. The Jaccard beta-diversity score metric of the similarity  
620 between a pair of strains was calculated as the intersection over the union of the detected gene  
621 cluster families. Using MZmine, we select peaks that were above a certain intensity threshold  
622 (we used base peak relative abundance of 1E6) in order to prioritize the chromatographic peaks  
623 that could reasonably be isolated for structure elucidation. In this example, we detected  
624 approximately 3,800 peaks with MS/MS spectra found in the analysis of the 16 most diverse  
625 strains. This MZmine list of peaks that have associated MS/MS data was filtered for minimum  
626 precursor mass of  $m/z$  500 to promote the presence of multiple moieties (substructures) in the  
627 predicted structures, generating 300 “.mgf” files. These mgf files were used by NPOMix to  
628 predict the GCFs/BGCs for each of the 300 MS/MS spectra. We filtered for BGC-MS/MS links  
629 that the query MS/MS spectra existed in the same strains that the query BGCs were found (e.g.,  
630 Fig 3C-D) and not across different strains (e.g., Fig. S2), using the Jaccard index in the  
631 presence/absence of fingerprints, essentially a pairwise analysis between the BGC fingerprint  
632 and the MS/MS fingerprint. This second filter narrowed down the number of mgf files to 72, as  
633 listed in Dataset S1, sheet six. These 72 mgf files were processed by Dereplicator+ for predicting  
634 structures for each MS/MS spectrum, leading to the annotation of brasilicardin A. Two other  
635 Dereplicator+ hits did not match the predicted GCFs. MZmine parameters were as follows:  
636 noise level of 1E6 for MS1 and 1E3 for MS/MS, minimum group size in number of scans of 4,  
637 group intensity threshold of 1E6, minimum highest intensity of 3E6,  $m/z$  tolerance of 10 ppm,  
638 retention time tolerance of 0.2, weight for  $m/z$  of 75%, and weight for retention time of 25%.

639  
640

641 **Expanding BGC and MS/MS fingerprints using biosynthetic classes.** In notebook 7, the BGC  
642 classes were annotated and included in the BGC fingerprints. To accomplish this, all of the  
643 antiSMASH annotations for a given BGC were added to the presence of all predicted classes.  
644 Each class represented a new column in the fingerprints and the columns were filled with 1 (if  
645 the class was present) and 0 (if the class was absent). We observed the following classes in our  
646 dataset: PKs, NRPs, terpenes, siderophores, RiPPs, phosphonates, oligosaccharides, phenolic  
647 metabolites, others/unknowns and other minor classes. In the MS/MS fingerprint, for each one  
648 of the 15 validated MS/MS spectra, we annotated the presence/absence of the biosynthetic  
649 classes based on the known structures. These new fingerprints were used in the machine  
650 learning process, analogously to the notebook 3.

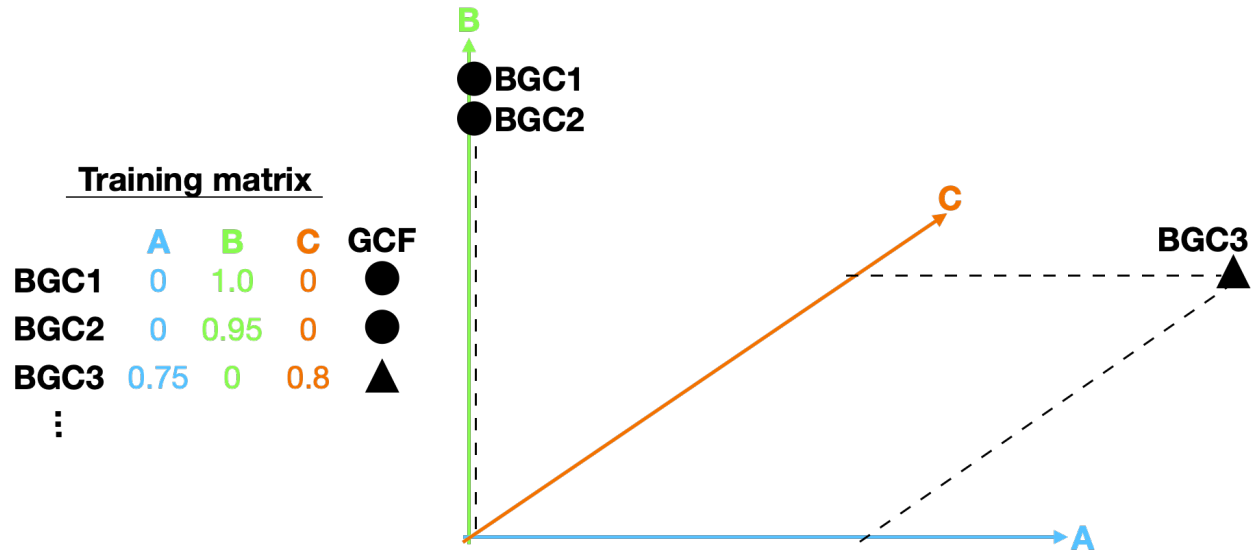

651  
652 **Fig. S1.** Representation of how BGCs can be plotted in the KNN space by using the values in the  
653 training matrix, each column represents a genome in the training set and it also represents a  
654 dimension in the KNN space (1,040 genomes distributed in 1,040 columns). This example has  
655 three dimensions because it uses only three genomes; the actual training matrix used in this  
656 study had 1,040 genomes and therefore 1,040 dimensions.  
657

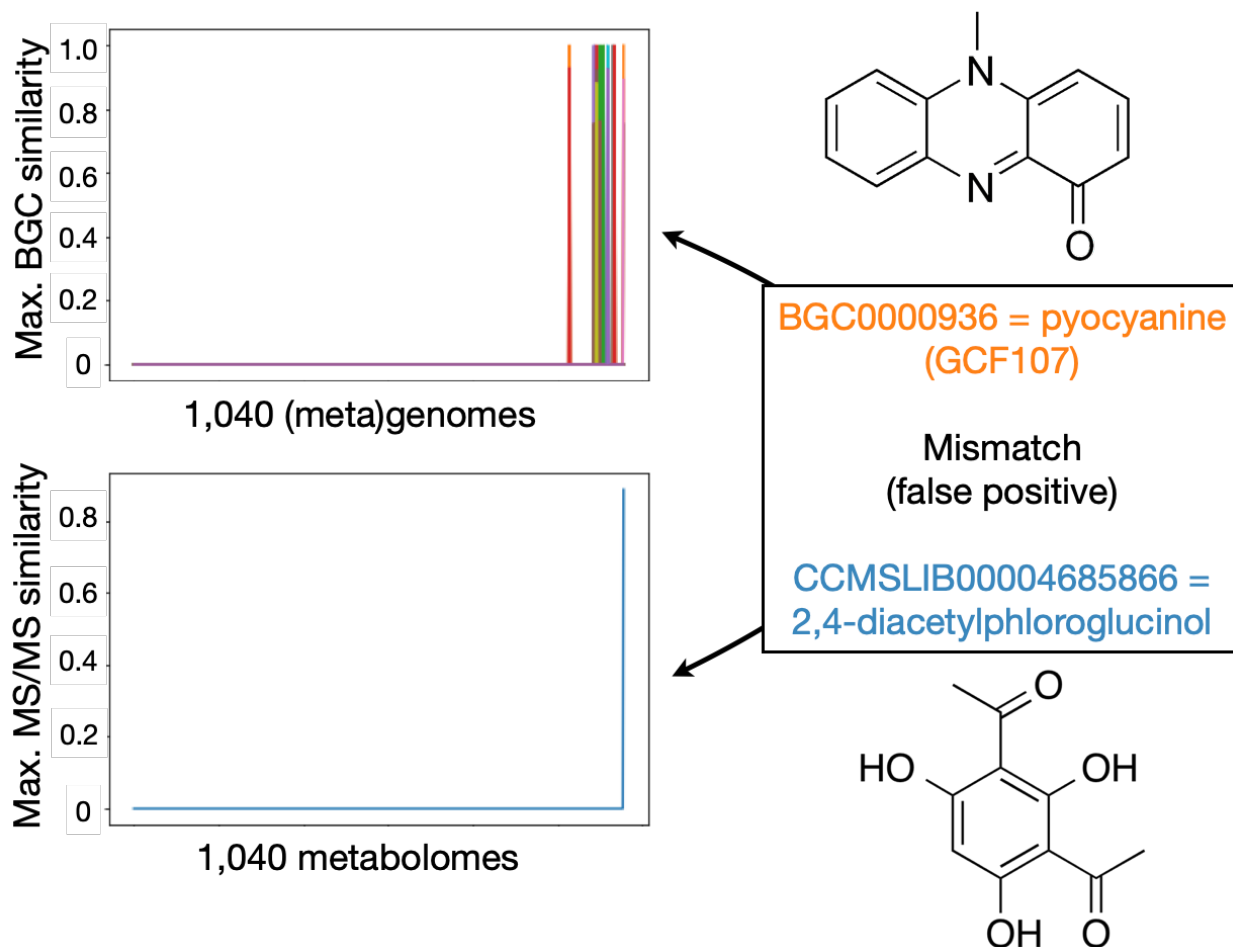

658  
659  
660  
661  
662  
663  
664  
665

**Fig. S2.** Representation of a mismatch linked by the KNN algorithm using  $k = 3$ . It is visually clear that the closest neighboring BGC fingerprints for pyocyanine does not properly match the MS/MS fingerprint from the metabolite 2,4- diacetylphloroglucinol, indicating that NPOMix suggested the wrong GCF for the 2,4- diacetylphloroglucinol MS/MS spectrum.

666

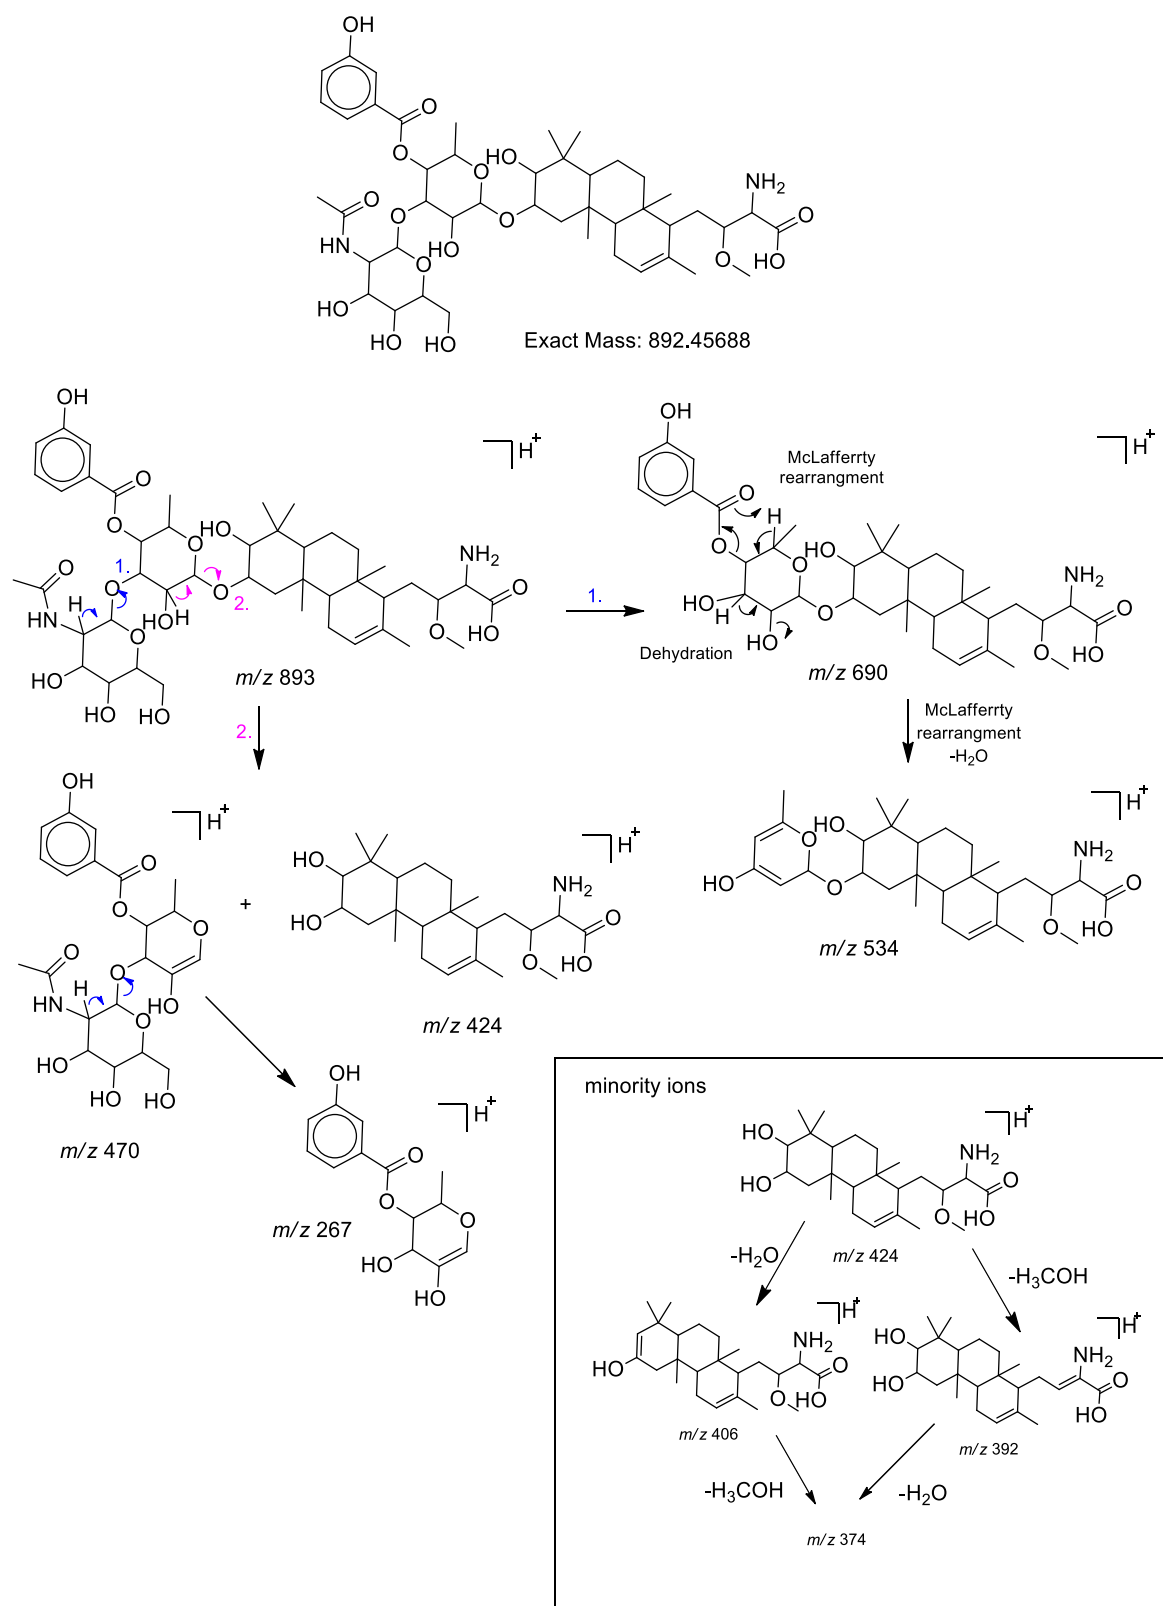

667

668

669



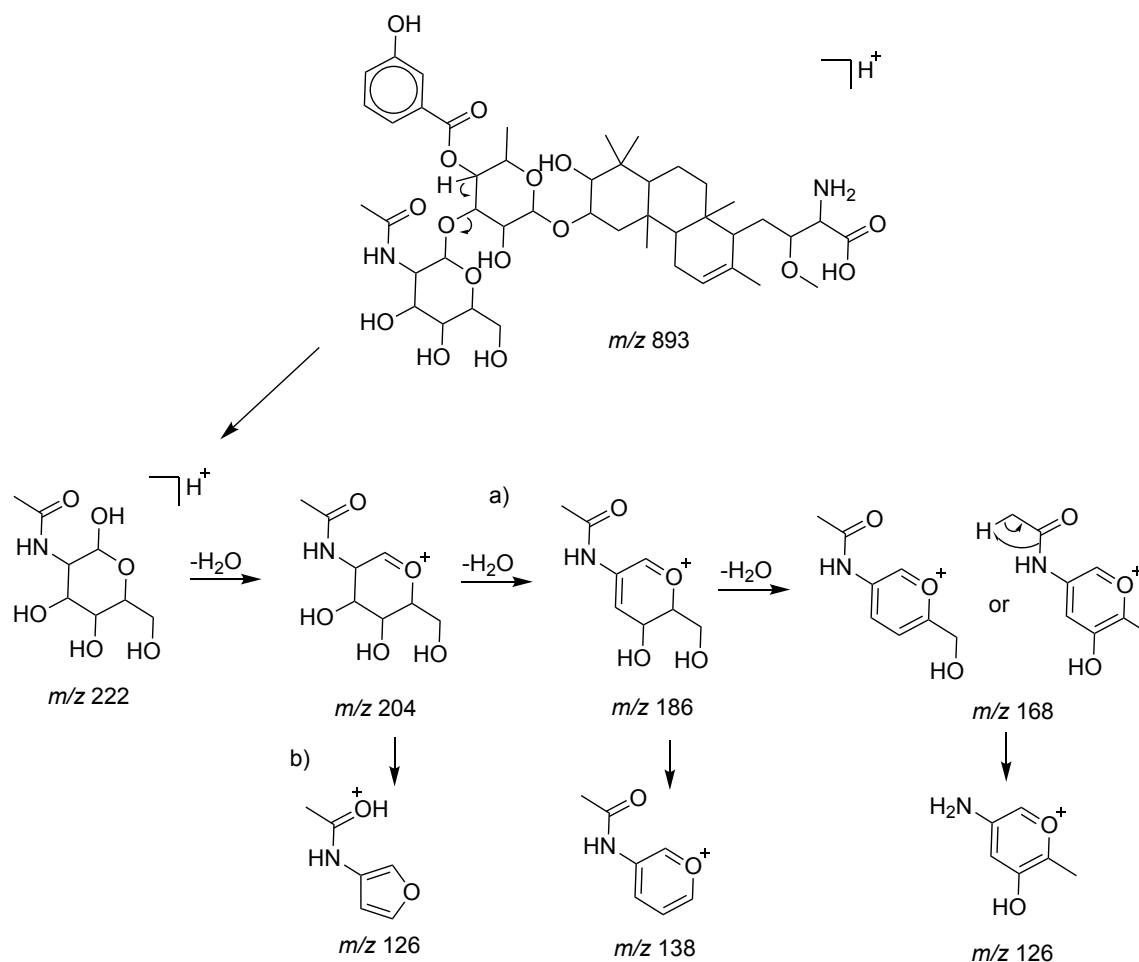

670  
671

672 **Fig. S3.** Proposed mechanism for the fragmentation of brasiliardin A by ESI mass spectrometry.  
673 The structure was proposed by NPOMix as a possible match for the MS/MS spectrum with  
674 protonated  $m/z$  893.4624. Dataset S1, sheet seven, shows the SMILES strings and delta  $m/z$   
675 values for the predicted structural fragments and the observed fragments in the MS/MS  
676 spectrum. All delta  $m/z$  values in the table were extremely small, strongly indicating that  
677 brasiliardin A is the correct structure for this MS/MS spectrum and it matches well with the  
678 BCG identified in genome of *Nocardia terpenica* IFM 0406 (BGC known to produce brasiliardin  
679 A, ID BGC0000632).

680  
681

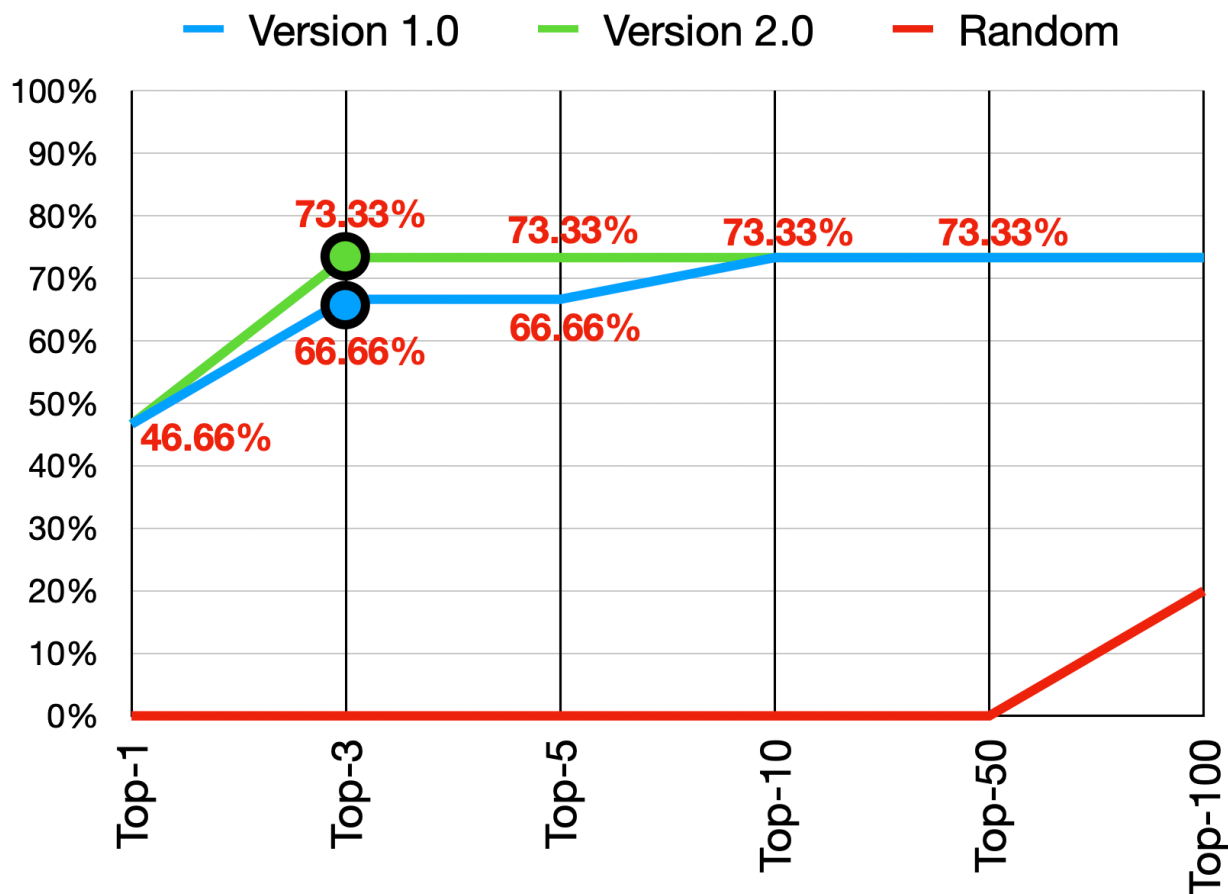

682  
683 **Fig. S4.** Comparison of precision curves before (blue line, version 1.0) and after addition of the  
684 biosynthetic class (green line, version 2.0). Best precisions are marked by dots (version 1.0 is  
685 top-3 = 66.66% and version 2.0 is top-3 = 73.33%). Randomness is represented by the red line.  
686  
687  
688  
689

## 690 References

- 691
- 692 1. E. O'Neill, Mining natural product biosynthesis in eukaryotic algae. *Mar. Drugs* **18**, 90  
693 (2020).
- 694 2. S. A. Kautsar, H. G. Suarez Duran, K. Blin, A. Osbourn, M. H. Medema, PlantiSMASH:  
695 Automated identification, annotation and expression analysis of plant biosynthetic gene  
696 clusters. *Nucleic Acids Res.* **45**, W55–W63 (2017).
- 697 3. S. D. Bentley, *et al.*, Complete genome sequence of the model actinomycete  
698 *Streptomyces coelicolor* A3(2). *Nature* **417**, 141–147 (2002).
- 699 4. M. H. Medema, *et al.*, antiSMASH: rapid identification, annotation and analysis of  
700 secondary metabolite biosynthesis gene clusters in bacterial and fungal genome  
701 sequences. *Nucleic Acids Res.* **39**, W339–46 (2011).
- 702 5. J. C. Navarro-muñoz, *et al.*, A computational framework to explore large-scale  
703 biosynthetic diversity. *Nat. Chem. Biol.* **16**, 60–68 (2019).
- 704 6. J. R. Doroghazi, *et al.*, A roadmap for natural product discovery based on large-scale  
705 genomics and metabolomics. *Nat. Chem. Biol.* **10**, 963–968 (2014).
- 706 7. K. R. Duncan, *et al.*, Molecular Networking and Pattern-Based Genome Mining Improves  
707 Discovery of Biosynthetic Gene Clusters and their Products from *Salinispora* Species.  
708 *Chem. Biol.*, **22**, 60–68 (2015).
- 709 8. L. Cao, *et al.*, MetaMiner: A Scalable Peptidogenomics Approach for Discovery of  
710 Ribosomal Peptide Natural Products with Blind Modifications from Microbial  
711 Communities. *Cell Syst.* **9**, 600–608.e4 (2019).
- 712 9. B. Behsaz, *et al.*, De Novo Peptide Sequencing Reveals Many Cyclopeptides in the Human  
713 Gut and Other Environments. *Cell Syst.* **10**, 99–108.e5 (2020).
- 714 10. G. Hjörleifsson Eldjárn, *et al.*, Ranking microbial metabolomic and genomic links in the  
715 NPLinker framework using complementary scoring functions. *PLOS Comput. Biol.* **17**,  
716 e1008920 (2021).
- 717 11. J. J. J. Van Der Hooft, *et al.*, Linking genomics and metabolomics to chart specialized  
718 metabolic diversity. *Chem. Soc. Rev.* **49**, 3297–3314 (2020).
- 719 12. S. A. Kautsar, *et al.*, MIBiG 2.0: A repository for biosynthetic gene clusters of known  
720 function. *Nucleic Acids Res.* **48**, D454–D458 (2020).
- 721 13. T. Leão, *et al.*, A Multi-Omics Characterization of the Natural Product Potential of  
722 Tropical Filamentous Marine Cyanobacteria. *Mar. Drugs* **19**, 20 (2021).
- 723 14. M. A. Schorn, *et al.*, A community resource for paired genomic and metabolomic data  
724 mining. *Nat. Chem. Biol.* **17**, 363–368 (2021).
- 725 15. E. P. Balskus, C. T. Walsh, The Genetic and Molecular Basis for Sunscreen Biosynthesis in  
726 Cyanobacteria. *Science (80-. )*. **329**, 1653–1656 (2010).
- 727 16. M. Wang, *et al.*, Sharing and community curation of mass spectrometry data with Global  
728 Natural Products Social Molecular Networking. *Nat. Biotechnol.* **34**, 828–837 (2016).
- 729 17. A. T. Aron, *et al.*, Reproducible molecular networking of untargeted mass spectrometry  
730 data using GNPS. *Nat. Protoc.* **15**, 1954–1991 (2020).
- 731 18. T. Leao, *et al.*, Comparative genomics uncovers the prolific and distinctive metabolic  
732 potential of the cyanobacterial genus *Moorea*. *Proc. Natl. Acad. Sci.* **114**, 3198–3203

- 733 (2017).
- 734 19. M. Taniguchi, *et al.*, Palmyramide a, a cyclic depsipeptide from a palmyra atoll collection  
735 of the marine cyanobacterium *lyngbya majuscula*. *J. Nat. Prod.* **73**, 393–398 (2010).
- 736 20. H. Luesch, W. Y. Yoshida, R. E. Moore, V. J. Paul, S. L. Mooberry, Isolation, structure  
737 determination, and biological activity of Lyngbyabellin A from the marine  
738 cyanobacterium *lyngbya majuscula*. *J. Nat. Prod.* **63**, 611–615 (2000).
- 739 21. R. V Grindberg, *et al.*, Single cell genome amplification accelerates identification of the  
740 apratoxin biosynthetic pathway from a complex microbial assemblage. *PLoS One* **6**,  
741 e18565 (2011).
- 742 22. J. Orjala, W. H. Gerwick, Barbamide, a chlorinated metabolite with molluscicidal activity  
743 from the Caribbean cyanobacterium *Lyngbya majuscula*. *J. Nat. Prod.* **59**, 427–430  
744 (1996).
- 745 23. Z. Chang, *et al.*, Biosynthetic pathway and gene cluster analysis of curacin A, an  
746 antitubulin natural product from the tropical marine cyanobacterium *Lyngbya majuscula*.  
747 *J. Nat. Prod.* **67**, 1356–1367 (2004).
- 748 24. B. Márquez, P. Verdier-Pinard, E. Hamel, W. H. Gerwick, Curacin D, an antimitotic agent  
749 from the marine cyanobacterium *Lyngbya majuscula*. *Phytochemistry* **49**, 2387–2389  
750 (1998).
- 751 25. K. Kleigrew, *et al.*, Combining Mass Spectrometric Metabolic Profiling with Genomic  
752 Analysis: A Powerful Approach for Discovering Natural Products from Cyanobacteria. *J.*  
753 *Nat. Prod.* **78**, 1671–1682 (2015).
- 754 26. G. J. Hooper, J. Orjala, R. C. Schatzman, W. H. Gerwick, Carmabins A and B , New  
755 Lipopeptides from the Caribbean Cyanobacterium *Lyngbya majuscula*. *J. Nat. Prod.* **61**,  
756 529–533 (1998).
- 757 27. D. McDonald, *et al.*, American Gut: an Open Platform for Citizen Science Microbiome  
758 Research. *mSystems* **3**, e00031-1 (2018).
- 759 28. H. Mohimani, *et al.*, Dereplication of microbial metabolites through database search of  
760 mass spectra. *Nat. Commun.* **9**, 4035 (2018).
- 761 29. W. Bittremieux, *et al.*, Universal MS/MS Visualization and Retrieval with the  
762 Metabolomics Spectrum Resolver Web Service. *bioRxiv* (2020).
- 763 30. H. Gross, *et al.*, The Genomisotopic Approach: A Systematic Method to Isolate Products  
764 of Orphan Biosynthetic Gene Clusters. *Chem. Biol.* **14**, 53–63 (2007).
- 765 31. T. Pluskal, S. Castillo, A. Villar-Briones, M. Orešič, MZmine 2: Modular framework for  
766 processing, visualizing, and analyzing mass spectrometry-based molecular profile data.  
767 *BMC Bioinformatics* **11**, 395 (2010).
- 768 32. H. Komaki, *et al.*, Brasilicardin A, a new terpenoid antibiotic from pathogenic *Nocardia*  
769 *brasiliensis*: Fermentation, isolation and biological activity. *J. Antibiot. (Tokyo)*. **52**, 13-19  
770 (1999).
- 771 33. Y. Hayashi, *et al.*, Cloning of the gene cluster responsible for the biosynthesis of  
772 brasilicardin a, a unique diterpenoid. *J. Antibiot. (Tokyo)*. **61**, 164–174 (2008).
- 773 34. C. Zhang, *et al.*, Small Molecule Accurate Recognition Technology ( SMART ) to Enhance  
774 Natural Products Research. *Sci. Rep.*, **7**, 14243 (2017).
- 775 35. R. Reher, *et al.*, A Convolutional Neural Network-Based Approach for the Rapid  
776 Annotation of Molecularly Diverse Natural Products. *J. Am. Chem. Soc.* **142**, 4114–4120

- 777 (2020).  
778 36. K. Dührkop, *et al.*, Systematic classification of unknown metabolites using high-resolution  
779 fragmentation mass spectra. *Nat. Biotechnol.* **39**, 462–471 (2020).  
780 37. M. Ernst, *et al.*, Molnetenhancer: Enhanced molecular networks by integrating  
781 metabolome mining and annotation tools. *Metabolites* **9**, 144 (2019).  
782 38. J. J. J. Van Der Hooft, *et al.*, Unsupervised Discovery and Comparison of Structural  
783 Families Across Multiple Samples in Untargeted Metabolomics. *Anal. Chem.* **89**, 7569–  
784 7577 (2017).  
785 39. K. Dührkop, *et al.*, SIRIUS 4: a rapid tool for turning tandem mass spectra into metabolite  
786 structure information. *Nat. Methods.* **39**, 462–471 (2019).  
787 40. A. S. Walker, J. Clardy, A Machine Learning Bioinformatics Method to Predict Biological  
788 Activity from Biosynthetic Gene Clusters. *J. Chem. Inf. Model.* **61**, 2560-2571 (2021).  
789 41. S. A. Kautsar, J. J. J. Van Der Hooft, D. De Ridder, M. H. Medema, BiG-SLiCE: A highly  
790 scalable tool maps the diversity of 1.2 million biosynthetic gene clusters. *Gigascience* **10**,  
791 1-17 (2021).  
792 42. F. Huber, L. Ridder, S. Rogers, J. J. J. van der Hooft, Spec2Vec: Improved mass spectral  
793 similarity scoring through learning of structural relationships. *PLoS Comput. Biol.* **17**,  
794 e1008724 (2020).  
795 43. F. Huber, S. van der Burg, J. J. J. van der Hooft, L. Ridder, MS2DeepScore - a novel deep  
796 learning similarity measure for mass fragmentation spectrum comparisons. *bioRxiv*  
797 (2021).  
798 44. J. J. J. Van Der Hooft, J. Wandy, M. P. Barrett, K. E. V. Burgess, S. Rogers, Topic modeling  
799 for untargeted substructure exploration in metabolomics. *Proc. Natl. Acad. Sci.* **113**,  
800 13738-13743 (2016).  
801 45. Y. Sugimoto, *et al.*, A metagenomic strategy for harnessing the chemical repertoire of the  
802 human microbiome. *Science.* **366**, 1309 (2019).  
803 46. E. Pereira-Flores, *et al.*, Mining metagenomes for natural product biosynthetic gene  
804 clusters: unlocking new potential with ultrafast techniques. *bioRxiv* (2021).  
805 47. T. Luzzatto-Knaan, *et al.*, Digitizing mass spectrometry data to explore the chemical  
806 diversity and distribution of marine cyanobacteria and algae. *Elife* **6**, 1686–1699 (2017).  
807 48. A. Bankevich, *et al.*, SPAdes: A New Genome Assembly Algorithm and Its Applications to  
808 Single-Cell Sequencing. *J. Comput. Biol.* **19**, 455–477 (2012).  
809 49. K. Blin, *et al.*, AntiSMASH 5.0: Updates to the secondary metabolite genome mining  
810 pipeline. *Nucleic Acids Res.* **47**, W81–W87 (2019).  
811
